# Supplementary material for: Stable prediction in high-dimensional linear models
Source: Springer Nature journal article supplement (doi:10.1007/s11222-016-9694-6), 2016-08-27
Supplement: 11222_2016_9694_MOESM1_ESM.pdf [file 11222_2016_9694_MOESM1_ESM.pdf]

# Stable Prediction in High-Dimensional Linear Models-Supplementary Materials

Bingqing Lin<sup>1</sup>, Qihua Wang<sup>1,2</sup>, Jun Zhang<sup>1</sup> and Zhen Pang<sup>3</sup>

<sup>1</sup>Institute of Statistical Sciences, Shenzhen University, Shenzhen 518060  
China

<sup>2</sup>Academy of Mathematics and Systems Science, Chinese Academy of Sciences  
Beijing 100190, China

<sup>3</sup>Department of Applied Mathematics, the Hong Kong Polytechnic University  
Hong Kong

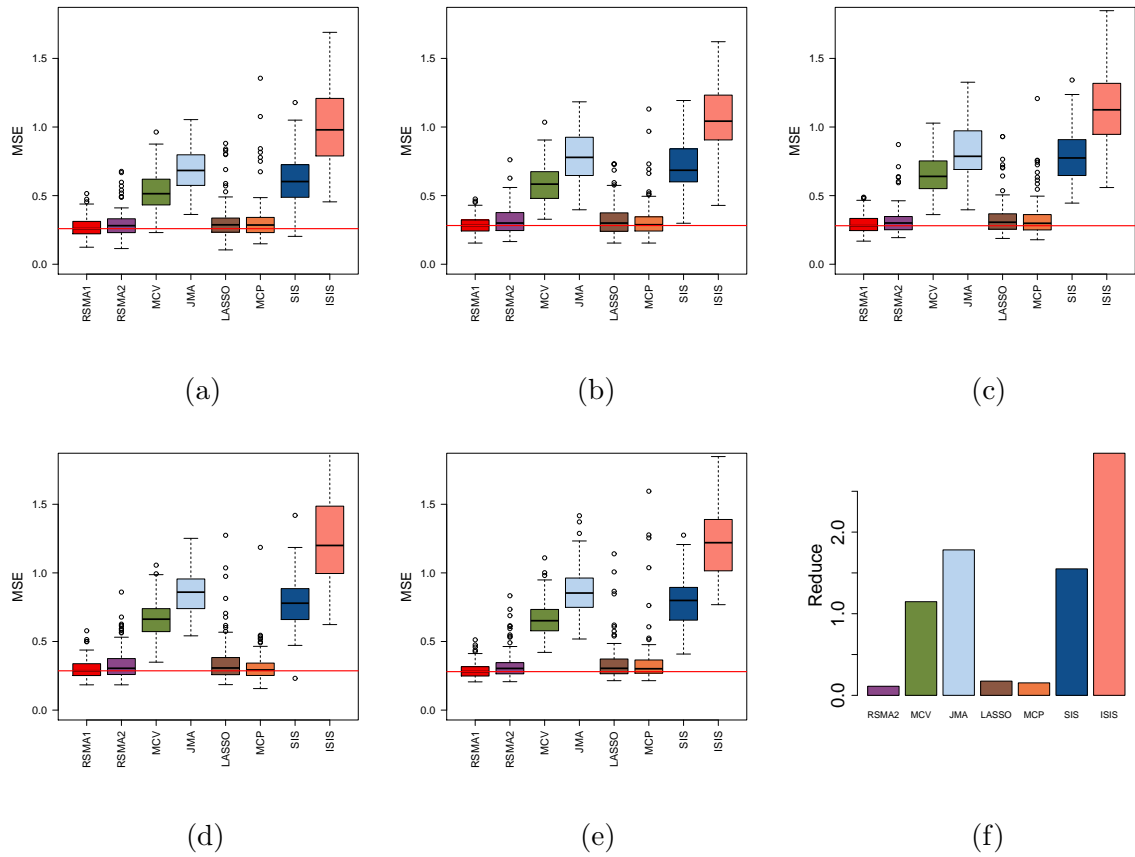

Figure 1: MSE for Example 2 with  $\rho = -0.7$  and  $p = 500$ . Subfigures (a)-(e) are results at  $h$  from 1 to 5. The red horizontal lines represent the median values of MSE for RSMA1. Subfigure (f) shows the average of relative MSE reduction of RSMA1 compared with other methods considered.

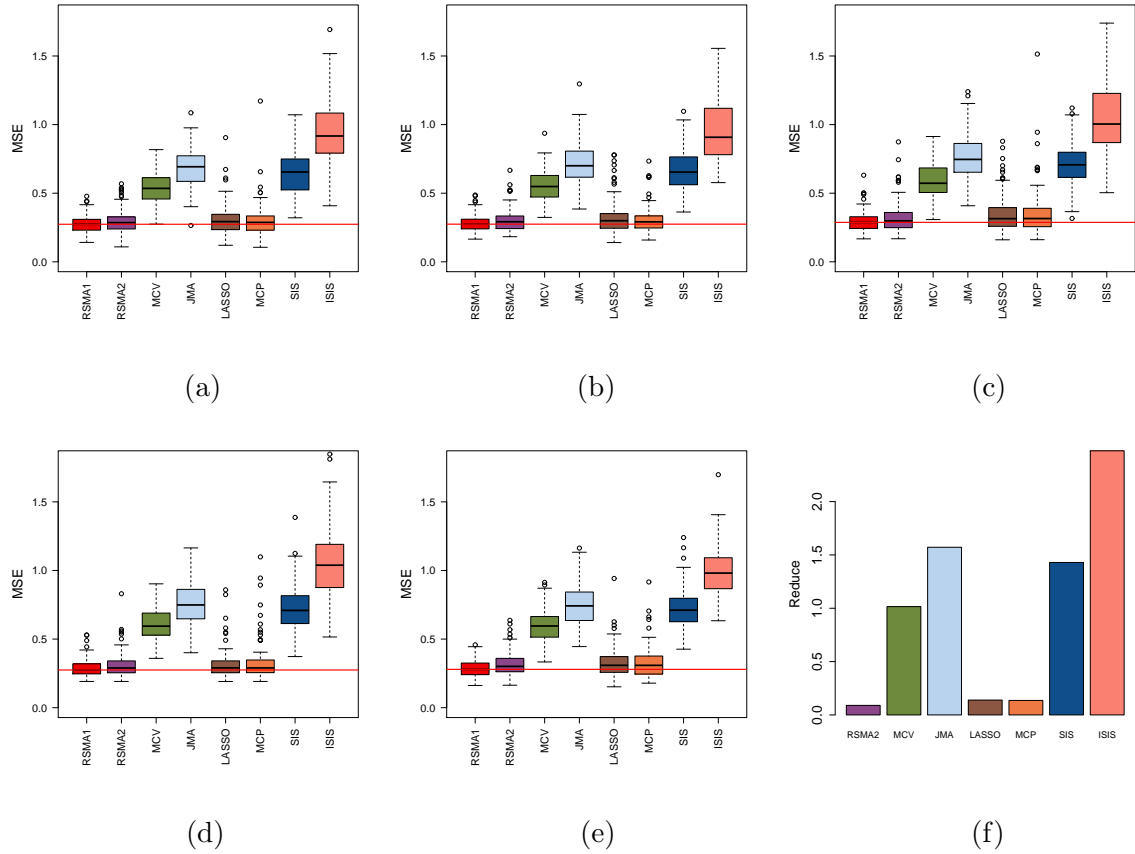

Figure 2: MSE for Example 2 with  $\rho = 0$  and  $p = 500$ . Subfigures (a)-(e) are results at  $h$  from 1 to 5. The red horizontal lines represent the median values of MSE for RSMA1. Subfigure (f) shows the average of relative MSE reduction of RSMA1 compared with other methods considered.

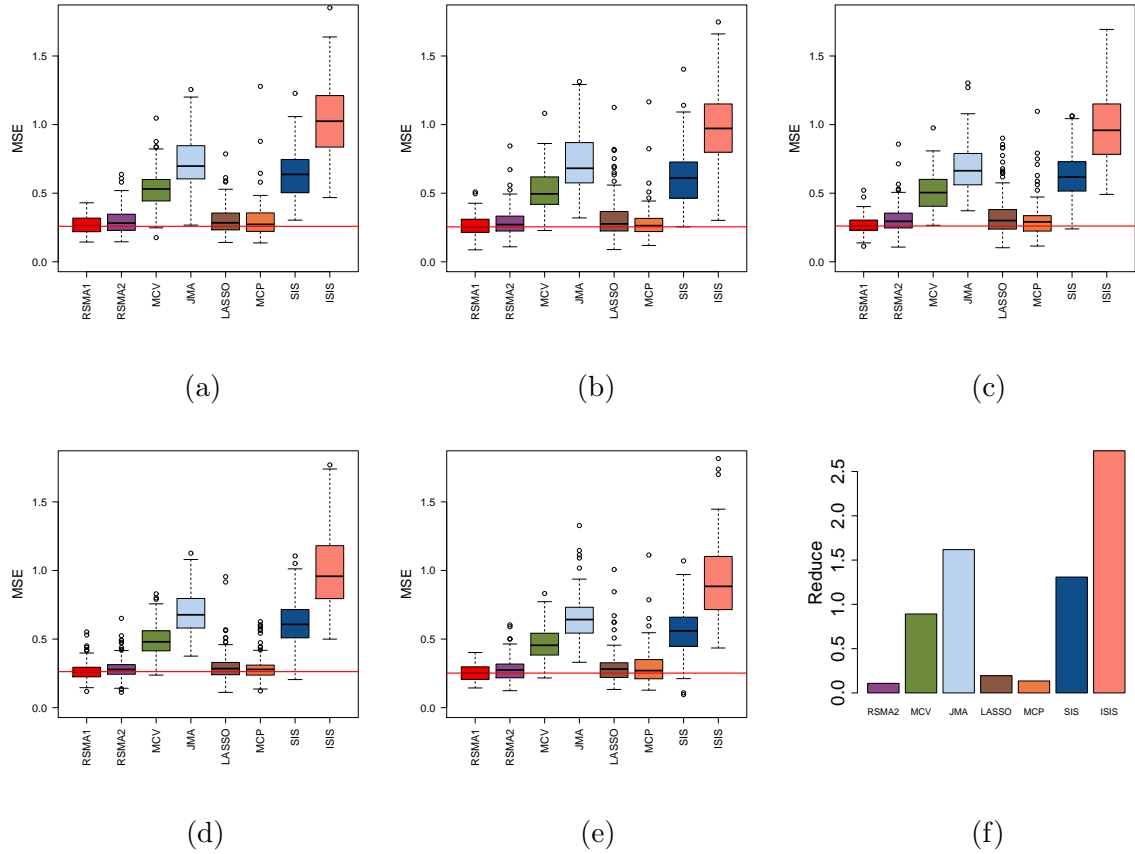

Figure 3: MSE for Example 2 with  $\rho = 0.7$  and  $p = 500$ . Subfigures (a)-(e) are results at  $h$  from 1 to 5. The red horizontal lines represent the median values of MSE for RSMA1. Subfigure (f) shows the average of relative MSE reduction of RSMA1 compared with other methods considered.

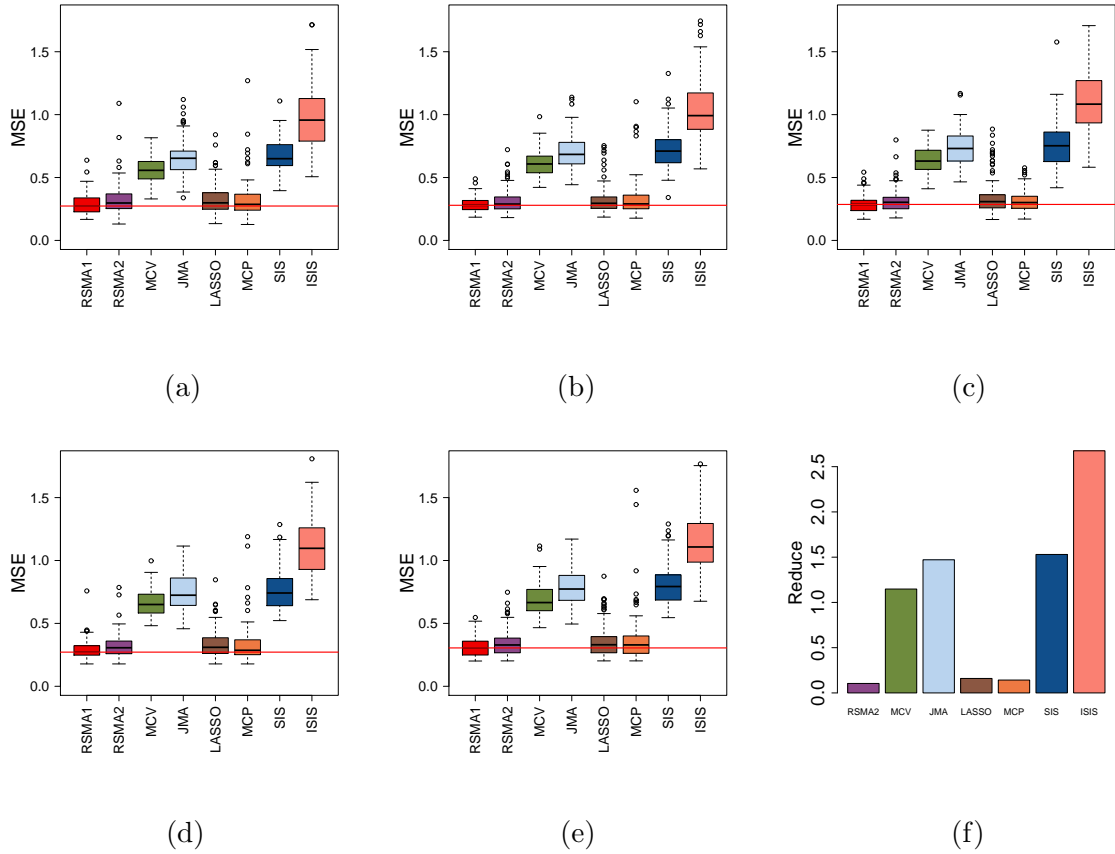

Figure 4: MSE for Example 2 with  $\rho = -0.7$  and  $p = 2000$ . Subfigures (a)-(e) are results at  $h$  from 1 to 5. The red horizontal lines represent the median values of MSE for RSMA1. Subfigure (f) shows the average of relative MSE reduction of RSMA1 compared with other methods considered.

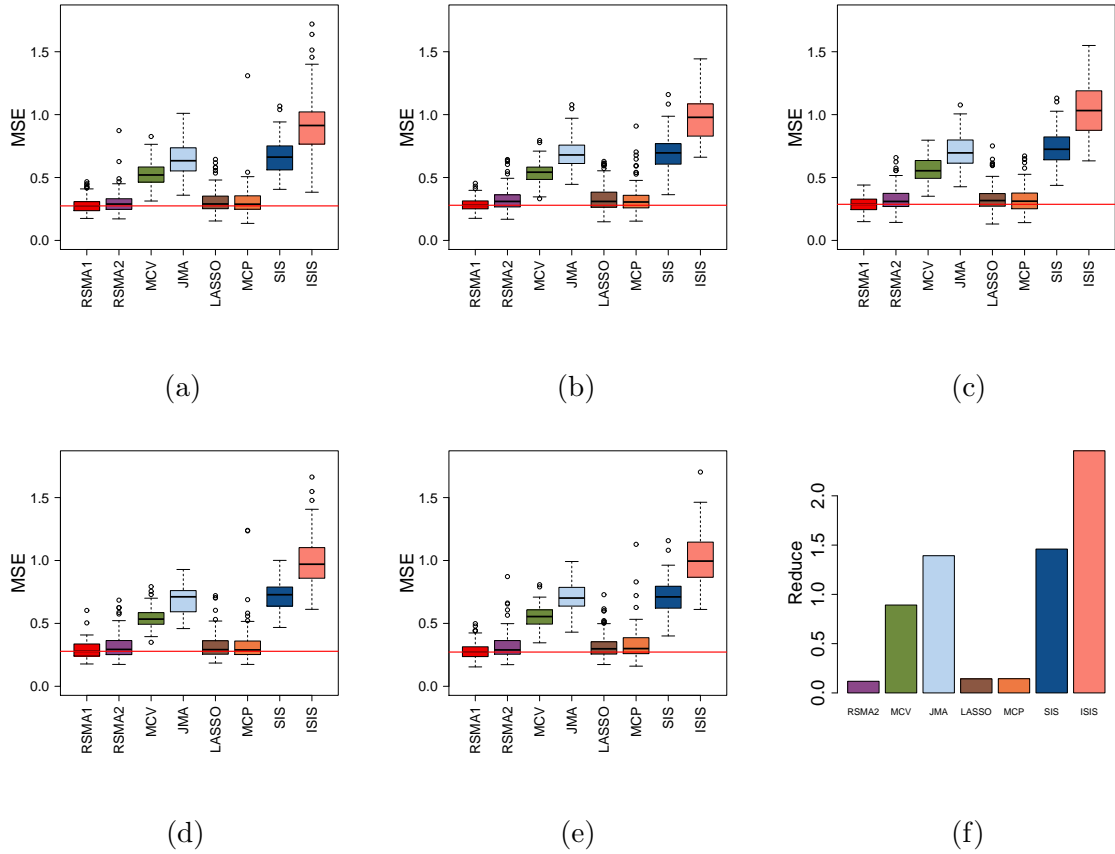

Figure 5: MSE for Example 2 with  $\rho = 0$  and  $p = 2000$ . Subfigures (a)-(e) are results at  $h$  from 1 to 5. The red horizontal lines represent the median values of MSE for RSMA1. Subfigure (f) shows the average of relative MSE reduction of RSMA1 compared with other methods considered.

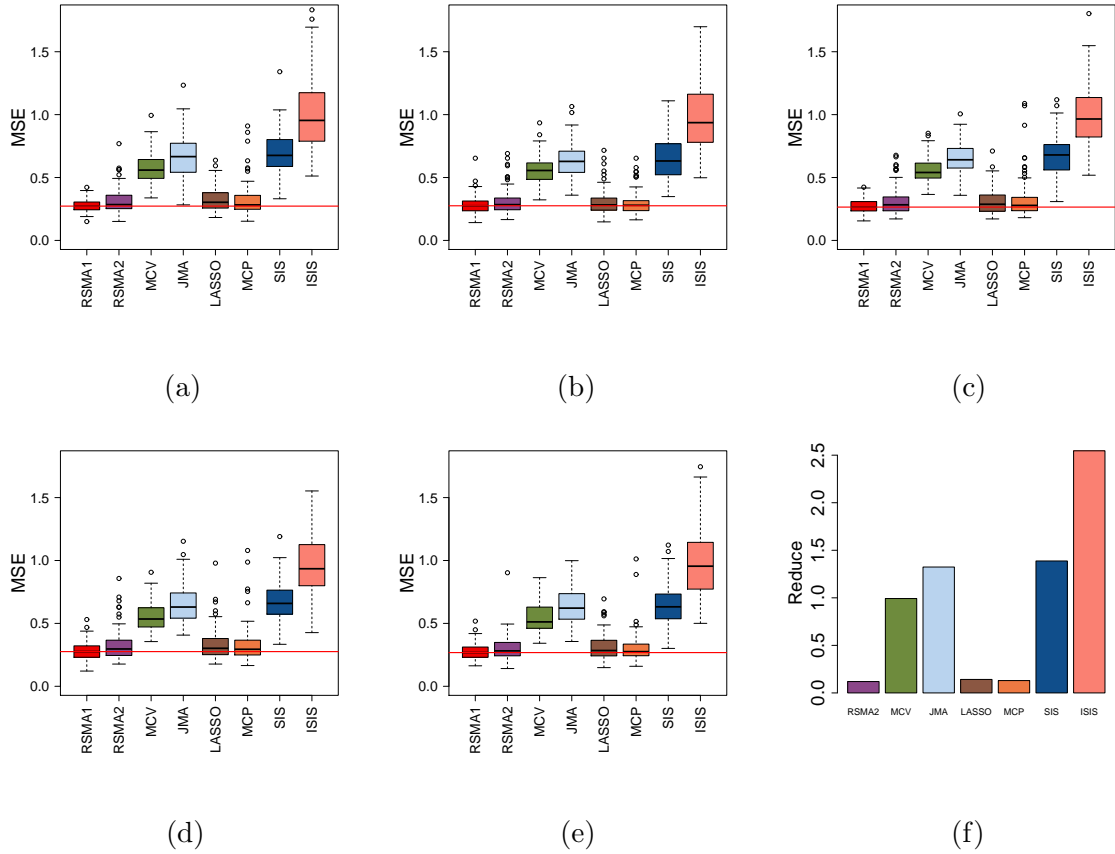

Figure 6: MSE for Example 2 with  $\rho = 0.7$  and  $p = 2000$ . Subfigures (a)-(e) are results at  $h$  from 1 to 5. The red horizontal lines represent the median values of MSE for RSMA1. Subfigure (f) shows the average of relative MSE reduction of RSMA1 compared with other methods considered.

Table 1: Simulation results for Example 4,  $p = 500, 1000$ . Scenario A: the error term has a  $t$  distribution with 3 degrees of freedom; Scenario B: the error term has a normal distribution  $N(0, \sigma_i^2)$  with  $\sigma_i = x_{1i}^2$ .  $10\times$  standard errors are reported in parentheses. The smallest MSEs and standard errors are marked in bold.

|            | $p$  | RSMA1         | RSMA2         | MCV    | JMA    | LASSO  | MCP    | SIS    | ISIS   |
|------------|------|---------------|---------------|--------|--------|--------|--------|--------|--------|
| Scenario A | 500  | 0.84          | <b>0.78</b>   | 1.03   | 2.23   | 1.10   | 1.37   | 1.00   | 1.94   |
|            |      | (0.57)        | <b>(0.53)</b> | (0.69) | (1.37) | (0.67) | (0.78) | (1.00) | (1.20) |
|            | 1000 | 0.92          | <b>0.81</b>   | 1.59   | 2.29   | 1.24   | 1.40   | 1.13   | 1.88   |
|            |      | (0.59)        | <b>(0.57)</b> | (0.97) | (1.54) | (0.74) | (0.91) | (1.02) | (1.20) |
| Scenario B | 500  | 0.77          | <b>0.71</b>   | 0.98   | 2.09   | 1.04   | 1.21   | 0.88   | 1.67   |
|            |      | (0.42)        | <b>(0.42)</b> | (0.51) | (0.69) | (0.61) | (0.68) | (0.69) | (0.93) |
|            | 1000 | 0.91          | <b>0.85</b>   | 1.52   | 2.25   | 1.27   | 1.56   | 1.12   | 1.90   |
|            |      | <b>(0.42)</b> | (0.44)        | (0.51) | (1.06) | (0.61) | (0.68) | (0.69) | (0.93) |

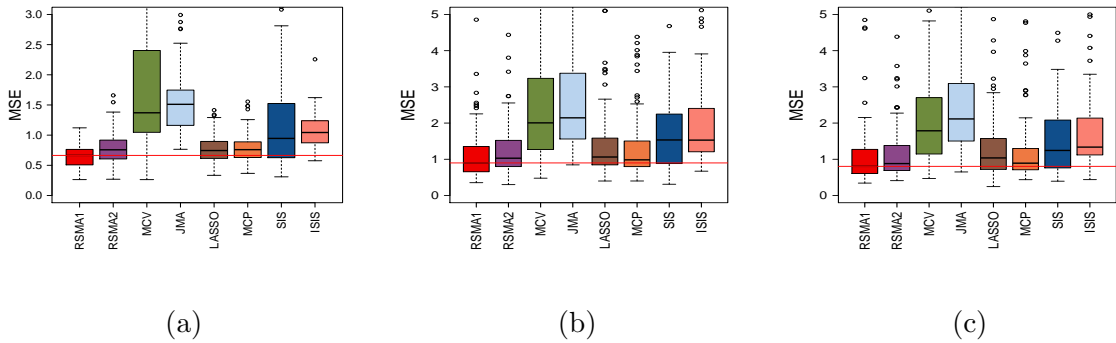

Figure 7: Simulation results for Example 5 with three distributions: (a) normal distribution  $N(0, 1.5)$ ; (b)  $t$  distribution with 3 degrees of freedom; (c) mixture distribution of normal and  $t$  distribution with degrees of freedom 2.



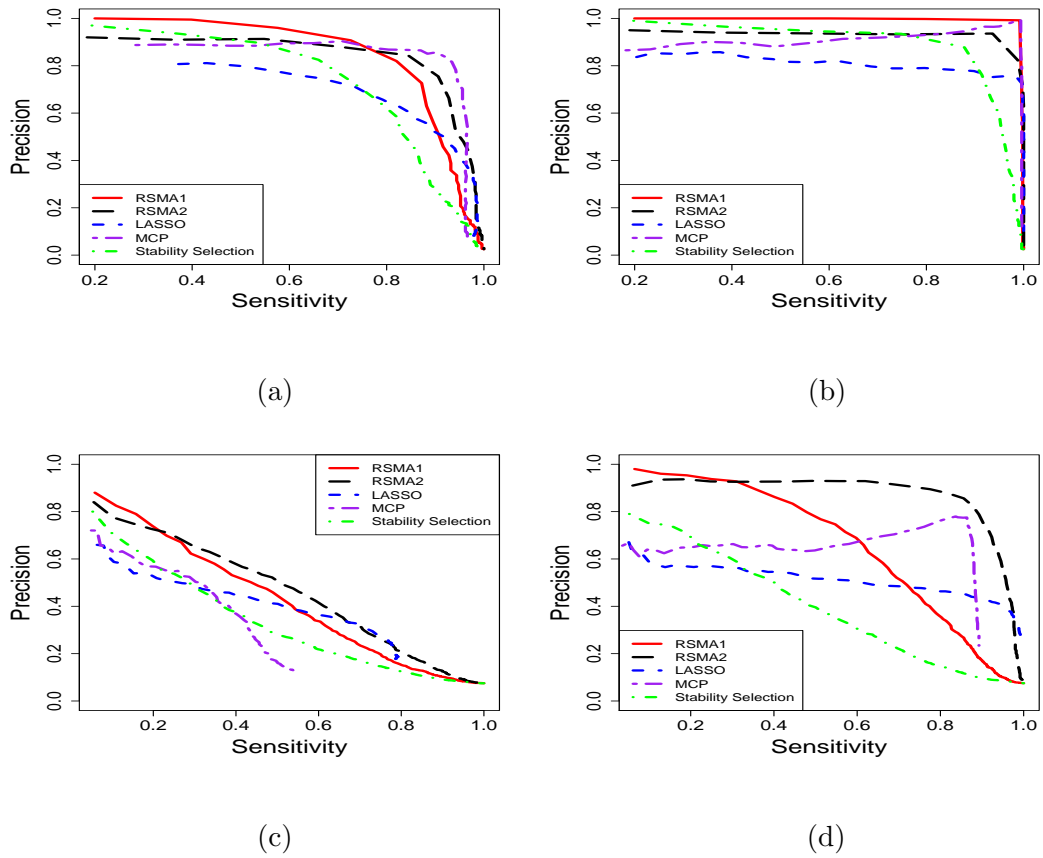

Figure 8: The precision-sensitivity curves comparing the ranking ability of all methods on the semi-real dataset for Leukaemia data with  $p = 200$  and error term following normal distribution. (a) SNR=2 and  $s=5$ ; (b) SNR=8 and  $s=5$ ; (c) SNR=2 and  $s=15$ ; (d) SNR=8 and  $s=15$ .

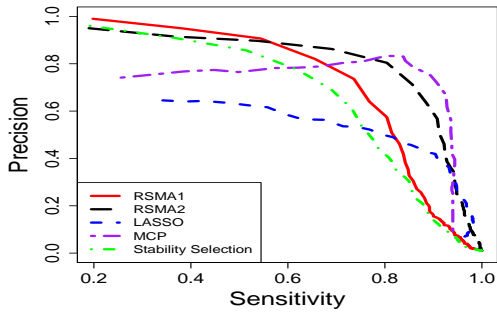

(a)

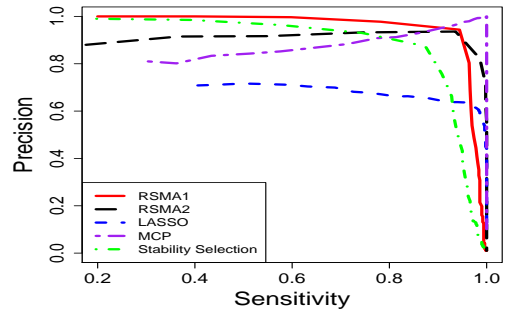

(b)

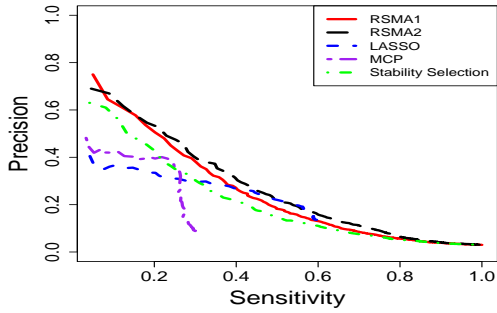

(c)

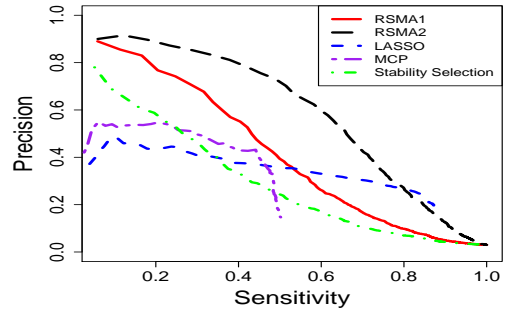

(d)

Figure 9: The precision-sensitivity curves comparing the ranking ability of all methods on the semi-real dataset for Leukaemia data with  $p = 500$  and error term following normal distribution. (a) SNR=2 and  $s=5$ ; (b) SNR=8 and  $s=5$ ; (c) SNR=2 and  $s=15$ ; (d) SNR=8 and  $s=15$ .

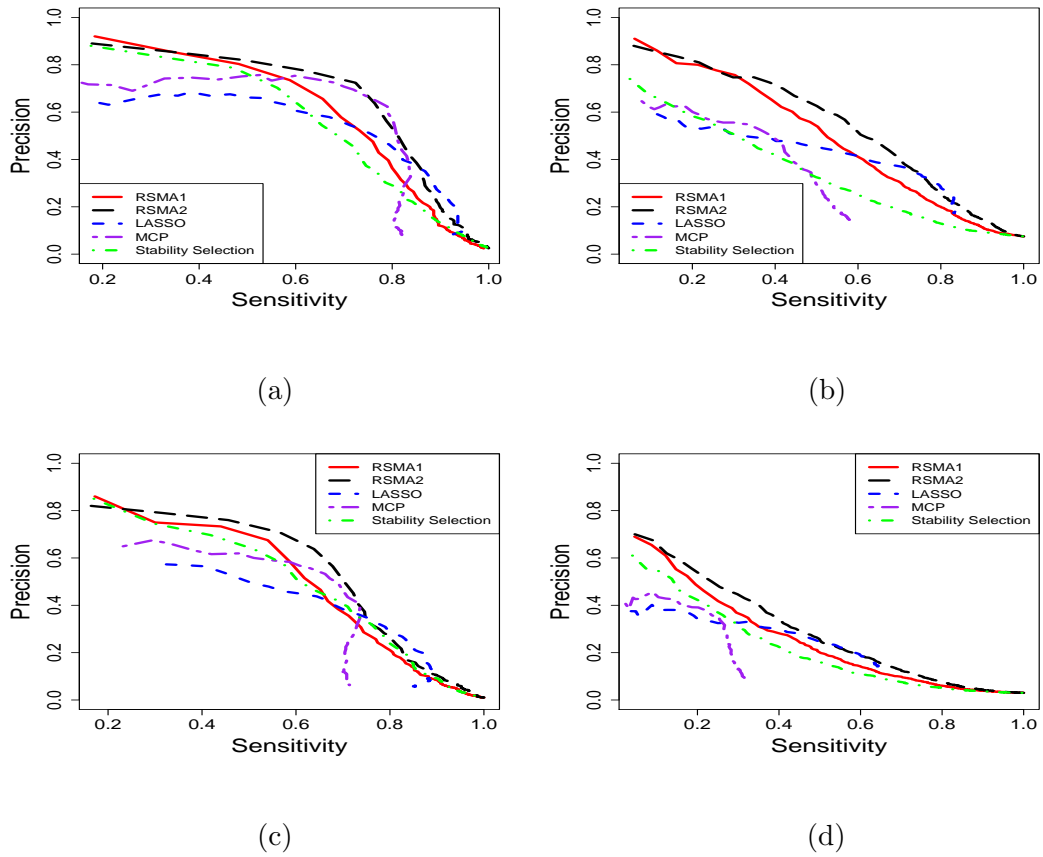

Figure 10: The precision-sensitivity curves comparing the ranking ability of all methods on the semi-real dataset for Leukaemia data with  $p = 200, 500$  and error term following  $t$  distribution with degrees of freedom 3. (a)  $p=200$  and  $s=5$ ; (b)  $p=200$  and  $s=15$ ; (c)  $p=500$  and  $s=5$ ; (d)  $p=500$  and  $s=15$ .
